# Supplementary material for: Malaria prevalence and molecular markers of Plasmodium falciparum antimalarial drug resistance among mobile populations in malaria-endemic countries: A systematic review and meta-analysis
Source: Research Square preprint supplement (doi:10.21203/rs.3.rs-9977950/v1), 2026-06-28
Supplement: Supplementary file 1 [file 150cd2c016161785172b2a32.docx]

**Figure S6.** Funnel plot and Egger’s regression test assessing publication bias in studies reporting Plasmodium falciparum prevalence
