# Supplementary material for: Malaria prevalence and molecular markers of Plasmodium falciparum antimalarial drug resistance among mobile populations in malaria-endemic countries: A systematic review and meta-analysis
Source: Research Square preprint supplement (doi:10.21203/rs.3.rs-9977950/v1), 2026-06-28
Supplement: Supplementary file 2 [file 8f8d01a1e2f83e50a3a3038e.docx]

**Table S4: Heterogeneity analysis**

**Heterogeneity based on WHO region**

**Heterogeneity based on Mobile population type**
