# Supplementary material for: Malaria prevalence and molecular markers of Plasmodium falciparum antimalarial drug resistance among mobile populations in malaria-endemic countries: A systematic review and meta-analysis
Source: Research Square preprint supplement (doi:10.21203/rs.3.rs-9977950/v1), 2026-06-28
Supplement: Supplementary file 3 [file c0de07640a74cac84d068c9d.docx]

**Table S3: Pooled prevalence of *Plasmodium falciparum* drug resistance mutations among mobile populations in malaria-endemic regions**

| **Resistance marker** | **African region** | | **Americas region** | | **Eastern MR** | | **SEA region** | | **WPR** | | **All regions** | |
| --- | --- | --- | --- | --- | --- | --- | --- | --- | --- | --- | --- | --- |
|  | Freq (%) | 95% CI | Freq (%) | 95% CI | Freq (%) | 95% CI | Freq (%) | 95% CI | Freq (%) | 95% CI | Freq (%) | 95% CI |
| *PfK13* | 17 | 12-24 | 0 |  | 2 | 0-4 | 21 | 14-30 | 7 | 4-10 | 12 | 9-15 |
| *pfcrt* | 39 | 33-45 | 0 |  | 61 | 54-68 | NR |  | 34 | 22-45 | 40 | 29-50 |
| *pfmdr1* | 68 | 59-76 | 0 |  | 27 | 21-33 | NR |  | 48 | 32-64 | 47 | 34-61 |
| *dhfr* | 96 | 93-99 | 0 |  | 94 | 88-97 | NR |  | 98 | 97-99 | 97 | 96-99 |
| *dhps* | 31 | 25-37 | NR |  | 66 | 56-74 | NR |  | 88 | 82-95 | 73 | 61-85 |
