# Supplementary material for: Malaria prevalence and molecular markers of Plasmodium falciparum antimalarial drug resistance among mobile populations in malaria-endemic countries: A systematic review and meta-analysis
Source: Research Square preprint supplement (doi:10.21203/rs.3.rs-9977950/v1), 2026-06-28
Supplement: Supplementary file 4 [file c882e282801ef63681b0b7b4.docx]

**Prevalence and molecular markers of *Plasmodium falciparum* antimalarial drug resistance among mobile populations in malaria-endemic countries: A Systematic Review and Meta-Analysis**

**Table S5**. Risk of bias (RoB) assessment for included studies

| Author, year | Selection bias due to sample size or sampling criteria | Selection bias due to the proportion of successful genotyping (< 90%) | Selection bias due to mobile characteristics (study participants and settings) not described | Detection bias due to unreliable measurement of exposure | Detection bias due to the reliability of  *P. falciparum* drug resistance mutationsdetection tools used | Detection bias due to confounding factors | Bias due to method of statistical analysis used for overall outcome | Bias due to method of data analysis used for associated factors | Aggregate assessment per article |
| --- | --- | --- | --- | --- | --- | --- | --- | --- | --- |
| Tukwasibwe S, 2024 | - | - | - | - | - | ? | - | - | Low |
| Wang X, 2022 | - | - | ? | - | ? | ? | - | - | Low |
| Kong X , 2022 | - | ? | - | - | - | ? | – | - | Low |
| Cheng W, 2021 | ? | ? | – | – | – | ? | – | + | Moderate |
| Yan H ,2021 | - | – | ? | - | – | ? | – | + | Moderate |
| Zhao D ,2021 | - | ? | - | – | – | ? | - | ? | Low |
| Yan H, 2020 | - | + | - | - | - | ? | - | + | Low |
| Wang X, 2020 | - | - | - | - | – | - | - | - | Low |
| Jiang T, 2020 | – | ? | – | – | + | ? | – | + | Low |
| Al-Rumhi A, 2020 | – | - | – | - | - | ? | – | - | Moderate |
| He Y, 2019 | - | - | + | - | – | ? | - | + | High |
| Bansal D, 2019 | – | ? | - | - | + | + | ? | – | Moderate |
| Xu C, 2019 | – | – | - | – | – | ? | – | - | Low |
| Zhou R, 2019 | – | + | – | – | - | - | – | - | Low |
| Yang C, 2019 | - | – | – | ? | – | + | ? | + | Low |
| Zhang T, 2018 | - | - | ? | ? | + | - | – | - | Moderate |
| Yao Y, 2018 | - | - | - | - | - | - | ? | - | Low |
| Acharya A, 2018 | - | - | – | - | - | ? | - | - | Moderate |
| Yang C, 2017 | - | - | - | - | - | + | - | + | Moderate |
| Son DH, 2017 | - | – | - | ? | - | – | ? | + | Moderate |
| Nyunt MH, 2017 | - | ? | - | - | ? | – | + | + | High |
| Edwards HM, 2015 | - | - | - | - | - | + | - | + | Moderate |
| Adhin MR, 2014 | – | ? | – | - | + | ? | – | - | High |
| Feng J , 2014 | - | - | + | - | - | - | - | - | Moderate |
| Depoortere E, 2005 | - | - | - | - | - | - | - | - | low |
| Djimdé A A, 2004 | - | - | ? | - | + | ? | ? | - | Moderate |

**Symbols used mean:* *Low risk (–), High risk (+), Moderate risk (?)*
