# Supplementary material for: Malaria prevalence and molecular markers of Plasmodium falciparum antimalarial drug resistance among mobile populations in malaria-endemic countries: A systematic review and meta-analysis
Source: Research Square preprint supplement (doi:10.21203/rs.3.rs-9977950/v1), 2026-06-28
Supplement: Supplementary file 5 [file fb2225fcf52c935787f1a962.docx]

**Table S1. Search string**

| PubMed  ALL January 01, 2000 to November 03, 2025 | Search string | Results |
| --- | --- | --- |
| Searched 3-11-2025 |  |  |
| 1 | ("plasmodium falciparum" OR P falciparum OR malaria OR "falciparum malaria").mp. | 122,573 |
| 2 | (migrant* OR "mobile population*" OR "truck driver*" OR refugee* OR "internally displaced" OR IDP* OR "cross-border" OR "seasonal worker*" OR "migrant labor*" OR "displaced persons" OR nomad* OR "informal trader*" OR traveller* OR "mobile population*" OR military OR soldier*).mp. | 182,153 |
| 3 | 1 AND 2 | 3,886 |
| 4 | (prevalence OR parasitemia OR "parasite density" OR "infection rate" OR "infection prevalence").mp. | 1,038,517 |
| 5 | 3 AND 4 | 644 |
| 6 | ("drug resistance" OR "antimalarial resistance" OR "molecular resistance" OR "drug-resistant" OR mutation* OR "artemisinin resistance" OR "resistance genes" OR pfk13 OR pfcrt OR pfmdr1 OR dhfr OR dhps OR "molecular marker*" OR pfcrt OR pfmdr1 OR kelch13 OR dhps OR dhfr OR plasmepsin 2 OR plasmepsin 3).mp. | 1,453,093 |
| 7 | 5 AND 6 | 84 |
| 8 | ("malaria-endemic" OR "malaria-endemic countr*" OR "endemic region*" OR "high malaria transmission" OR "Sub-Saharan Africa*" OR Africa* OR "South-East Asia*" OR "Eastern Mediterranean" OR "Latin America*").mp. | 456,765 |
| 9 | 7 AND 8 | 42 |
|  |  |  |
| Embase January 01, 2000 to 2025 October 31  Searched 3-11-2025 |  |  |
| 1 | ("plasmodium falciparum" OR P falciparum OR malaria OR "falciparum malaria").mp. | 157,890 |
| 2 | (migrant* OR "mobile population*" OR "truck driver*" OR refugee* OR "internally displaced" OR IDP* OR "cross-border" OR "seasonal worker*" OR "migrant labor*" OR "displaced persons" OR nomad* OR "informal trader*" OR traveller* OR "mobile population*" OR military OR soldier*).mp. | 194,180 |
| 3 | 1 AND 2 | 5,194 |
| 4 | (prevalence OR parasitemia OR "parasite density" OR "infection rate" OR "infection prevalence").mp. | 1,689,870 |
| 5 | 3 AND 4 | 1,047 |
| 6 | ("drug resistance" OR "antimalarial resistance" OR "molecular resistance" OR "drug-resistant" OR mutation* OR "artemisinin resistance" OR "resistance genes" OR pfk13 OR pfcrt OR pfmdr1 OR dhfr OR dhps OR "molecular marker*" OR pfcrt OR pfmdr1 OR kelch13 OR dhps OR dhfr OR plasmepsin 2 OR plasmepsin 3).mp. | 1,891,419 |
| 7 | 5 AND 6 | 150 |
| 8 | ("malaria-endemic" OR "malaria-endemic countr*" OR "endemic region*" OR "high malaria transmission" OR "Sub-Saharan Africa*" OR Africa* OR "South-East Asia*" OR "Eastern Mediterranean" OR "Latin America*").mp. | 557,928 |
| 9 | 7 AND 8 | 59 |
|  |  |  |
| Global Health January 01, 2000 to 2025 Week 31  Searched 3-11-2025 |  |  |
| 1 | ("plasmodium falciparum" OR P falciparum OR malaria OR "falciparum malaria").mp. | 131,430 |
| 2 | (migrant* OR "mobile population*" OR "truck driver*" OR refugee* OR "internally displaced" OR IDP* OR "cross-border" OR "seasonal worker*" OR "migrant labor*" OR "displaced persons" OR nomad* OR "informal trader*" OR traveller* OR "mobile population*" OR military OR soldier*).mp. | 60,962 |
| 3 | 1 AND 2 | 6,221 |
| 4 | (prevalence OR parasitemia OR "parasite density" OR "infection rate" OR "infection prevalence").mp. | 577,931 |
| 5 | 3 AND 4 | 1,471 |
| 6 | ("drug resistance" OR "antimalarial resistance" OR "molecular resistance" OR "drug-resistant" OR mutation* OR "artemisinin resistance" OR "resistance genes" OR pfk13 OR pfcrt OR pfmdr1 OR dhfr OR dhps OR "molecular marker*" OR pfcrt OR pfmdr1 OR kelch13 OR dhps OR dhfr OR plasmepsin 2 OR plasmepsin 3).mp. | 290,547 |
| 7 | 5 AND 6 | 210 |
| 8 | ("malaria-endemic" OR "malaria-endemic countr*" OR "endemic region*" OR "high malaria transmission" OR "Sub-Saharan Africa*" OR Africa* OR "South-East Asia*" OR "Eastern Mediterranean" OR "Latin America*").mp. | 984,087 |
| 9 | 7 AND 8 | 169 |
|  |  |  |
| SCOPUS  Searched 3-11-2025 |  |  |
| 1 | TITLE-ABS-KEY ("plasmodium falciparum" OR P falciparum OR malaria OR "falciparum malaria") | 75,132 |
| 2 | TITLE-ABS-KEY (migrant* OR "mobile population*" OR "truck driver*" OR refugee* OR "internally displaced" OR IDP* OR "cross-border" OR "seasonal worker*" OR "migrant labor*" OR "displaced persons" OR nomad* OR "informal trader*" OR traveller* OR "mobile population*" OR military OR soldier*) | 708,675 |
| 3 | 1 AND 2 | 1,984 |
| 4 | TITLE-ABS-KEY (prevalence OR parasitemia OR "parasite density" OR "infection rate" OR "infection prevalence") | 1,564,662 |
| 5 | 3 AND 4 | 652 |
| 6 | TITLE-ABS-KEY ("drug resistance" OR "antimalarial resistance" OR "molecular resistance" OR "drug-resistant" OR mutation* OR "artemisinin resistance" OR "resistance genes" OR pfk13 OR pfcrt OR pfmdr1 OR dhfr OR dhps OR "molecular marker*" OR pfcrt OR pfmdr1 OR kelch13 OR dhps OR dhfr OR plasmepsin 2 OR plasmepsin 3) | 1,850,964 |
| 7 | 5 AND 6 | 131 |
| 8 | TITLE-ABS-KEY ("malaria-endemic" OR "malaria-endemic countr*" OR "endemic region*" OR "high malaria transmission" OR "Sub-Saharan Africa*" OR Africa* OR "South-East Asia*" OR "Eastern Mediterranean" OR "Latin America*") | 1,130,192 |
| 9 | 7 AND 8 | 50 |
|  | TOTAL RETRIEVED | 320 |
|  | DUPLICATES | 126 |
|  | **FOR SCREENING** | **194** |
